# Supplementary material for: Self-Power Dynamic Sensor Based on Triboelectrification for Tilt of Direction and Angle
Source: MDPI journal article supplement (doi:10.3390/s18072384), 2018-07-22
Supplement: s1 [file s1]

# **Supporting Information**

## **Self-Power Dynamic Sensor Based on Triboelectrification for Tilt of Direction and Angle**

**Hyeonhee Roh, Inkyum Kim, Jinsoo Yu and Daewon Kim \***

Department of Electronic Engineering, Kyung Hee University, 1732 Deogyeong-daero, Giheung-gu, Yongin 17104, Korea; hyeonhee@khu.ac.kr (H.R.); inkyum.kim@khu.ac.kr (I.K.); yjinsoo23@khu.ac.kr (J.Y.)

\* Correspondence: daewon@khu.ac.kr; Tel.: +82-31-201-2567

---

## **Table of Contents**

- 1. The tilting direction of the OT-TES**
- 2. The DAQ output voltage of the OT-TES when tilting the device in the straight direction**
- 3. The DAQ output voltage of the OT-TES from eight Al electrodes when tilting the device in the diagonal direction**
- 4. The DAQ output voltage of the OT-TES when tilting the device in the diagonal direction**

## 1. The tilting direction of the OT-TES

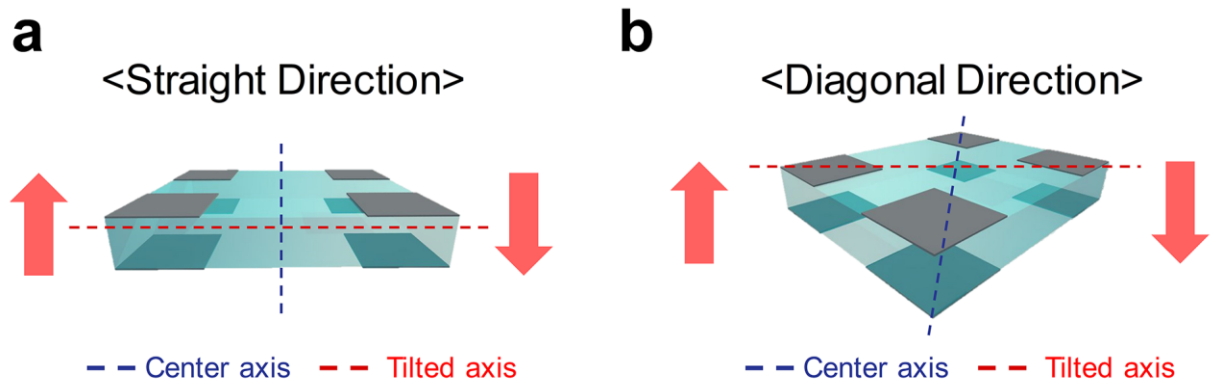

**Figure A1.** Two ways of the tilting direction (a) Straight direction (b) Diagonal direction.

2. The DAQ output voltage of the OT-TES when tilting the device in the straight direction

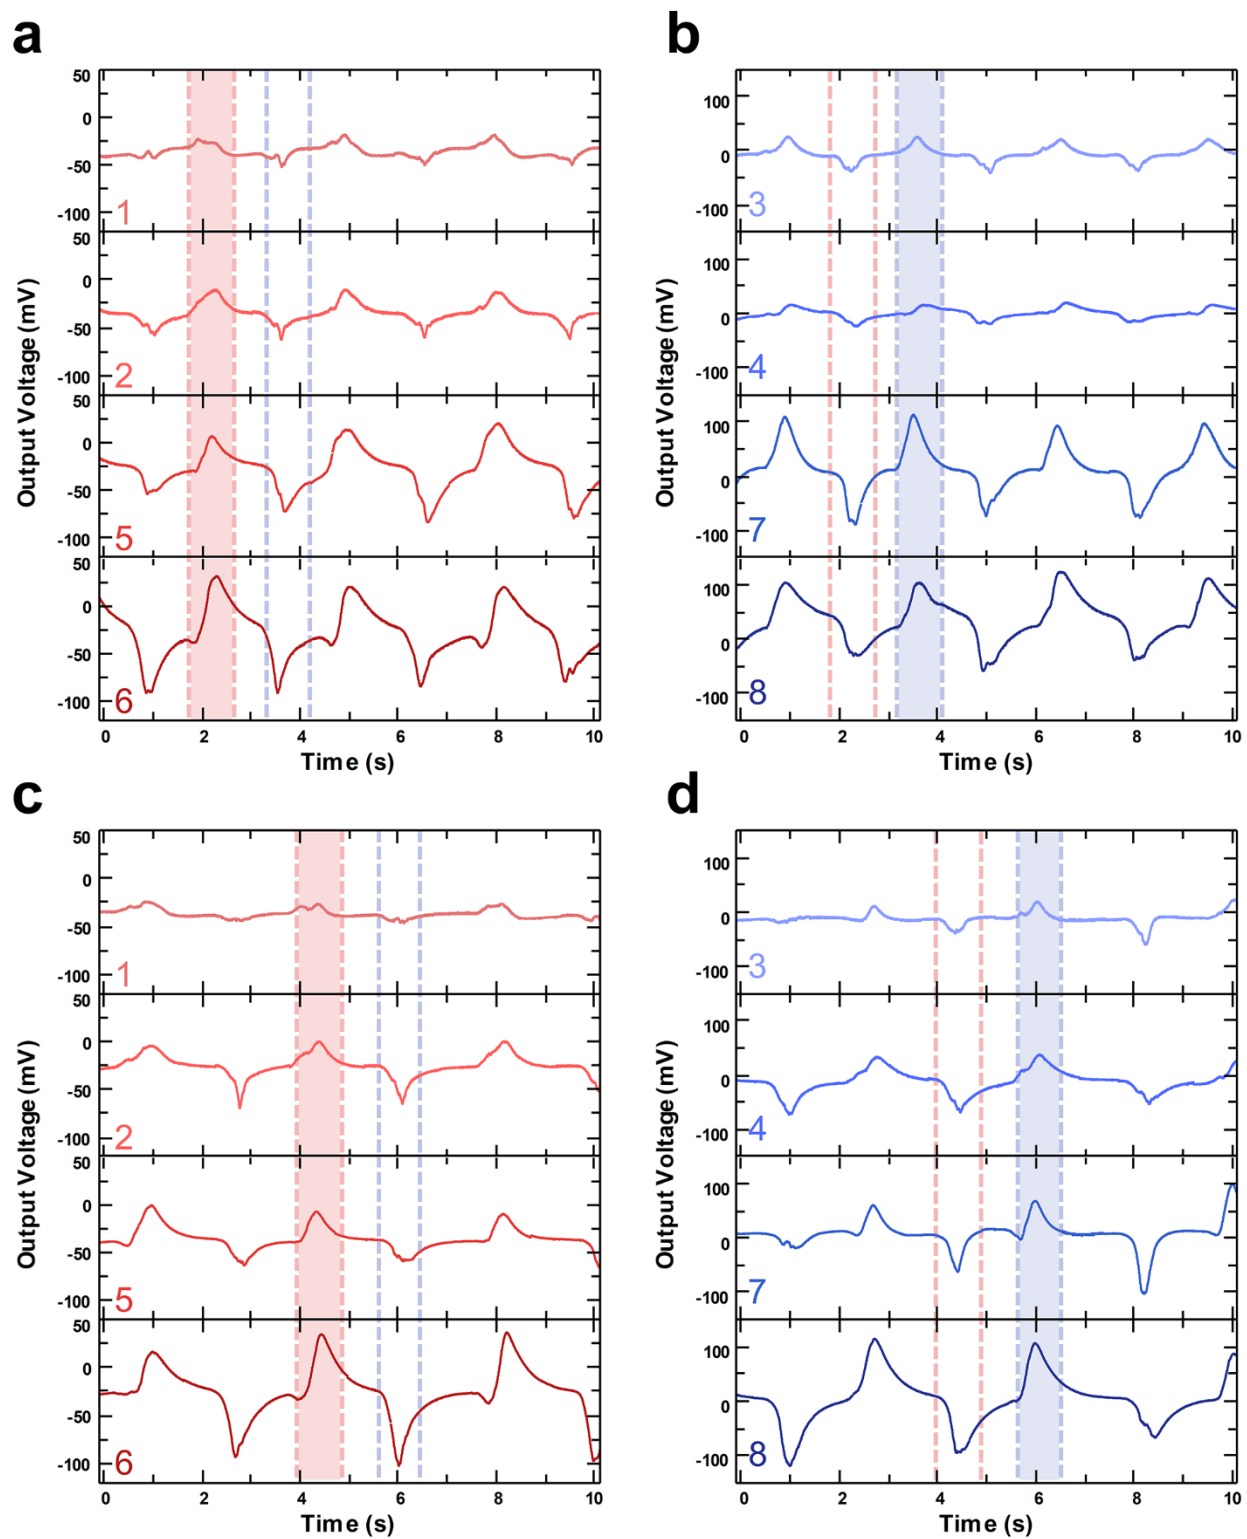

Figure A2. Voltage measurements of the OT-TES from eight different Al electrodes that

have adjusted tilt angle in the straight direction. (a) The DAQ output voltage of the left side electrodes at  $10^\circ$  (b) The DAQ output voltage of the right side electrodes at  $10^\circ$  (c) The DAQ output voltage of the left side electrodes at  $20^\circ$  (d) The DAQ output voltage of the right side electrodes at  $20^\circ$ .

### 3. The DAQ output voltage of the OT-TES from eight Al electrodes when tilting the device in the diagonal direction

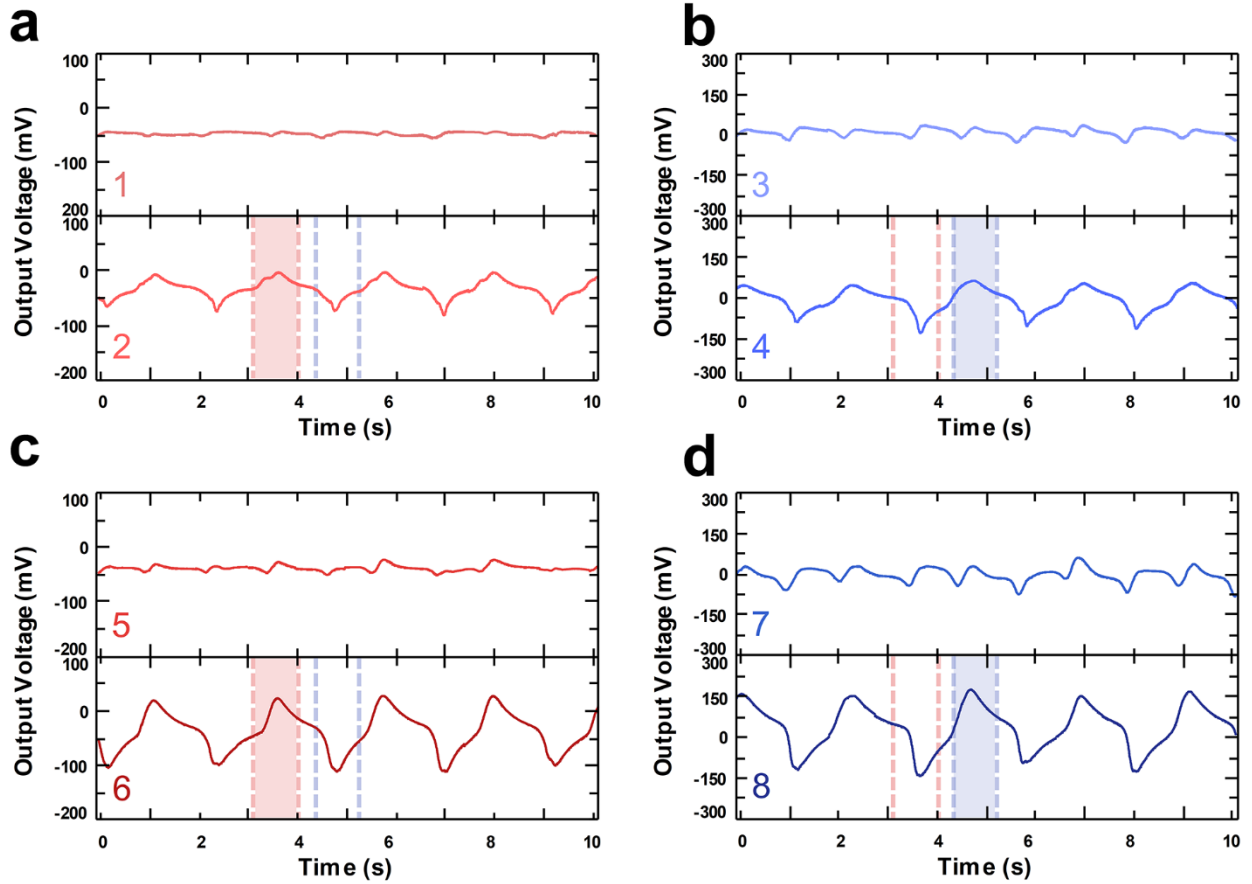

**Figure A3.** Voltage measurements of the OT-TES from eight Al electrodes that have 45 tilting degree in the diagonal direction: (a) The DAQ output voltage of the electrode 1 and 2 (b) The DAQ output voltage of the electrode 3 and 4 (c) The DAQ output voltage of the electrode 5 and 6 (d) The DAQ output voltage of the electrode 7 and 8.

4. The DAQ output voltage of the OT-TES when tilting the device in the diagonal direction

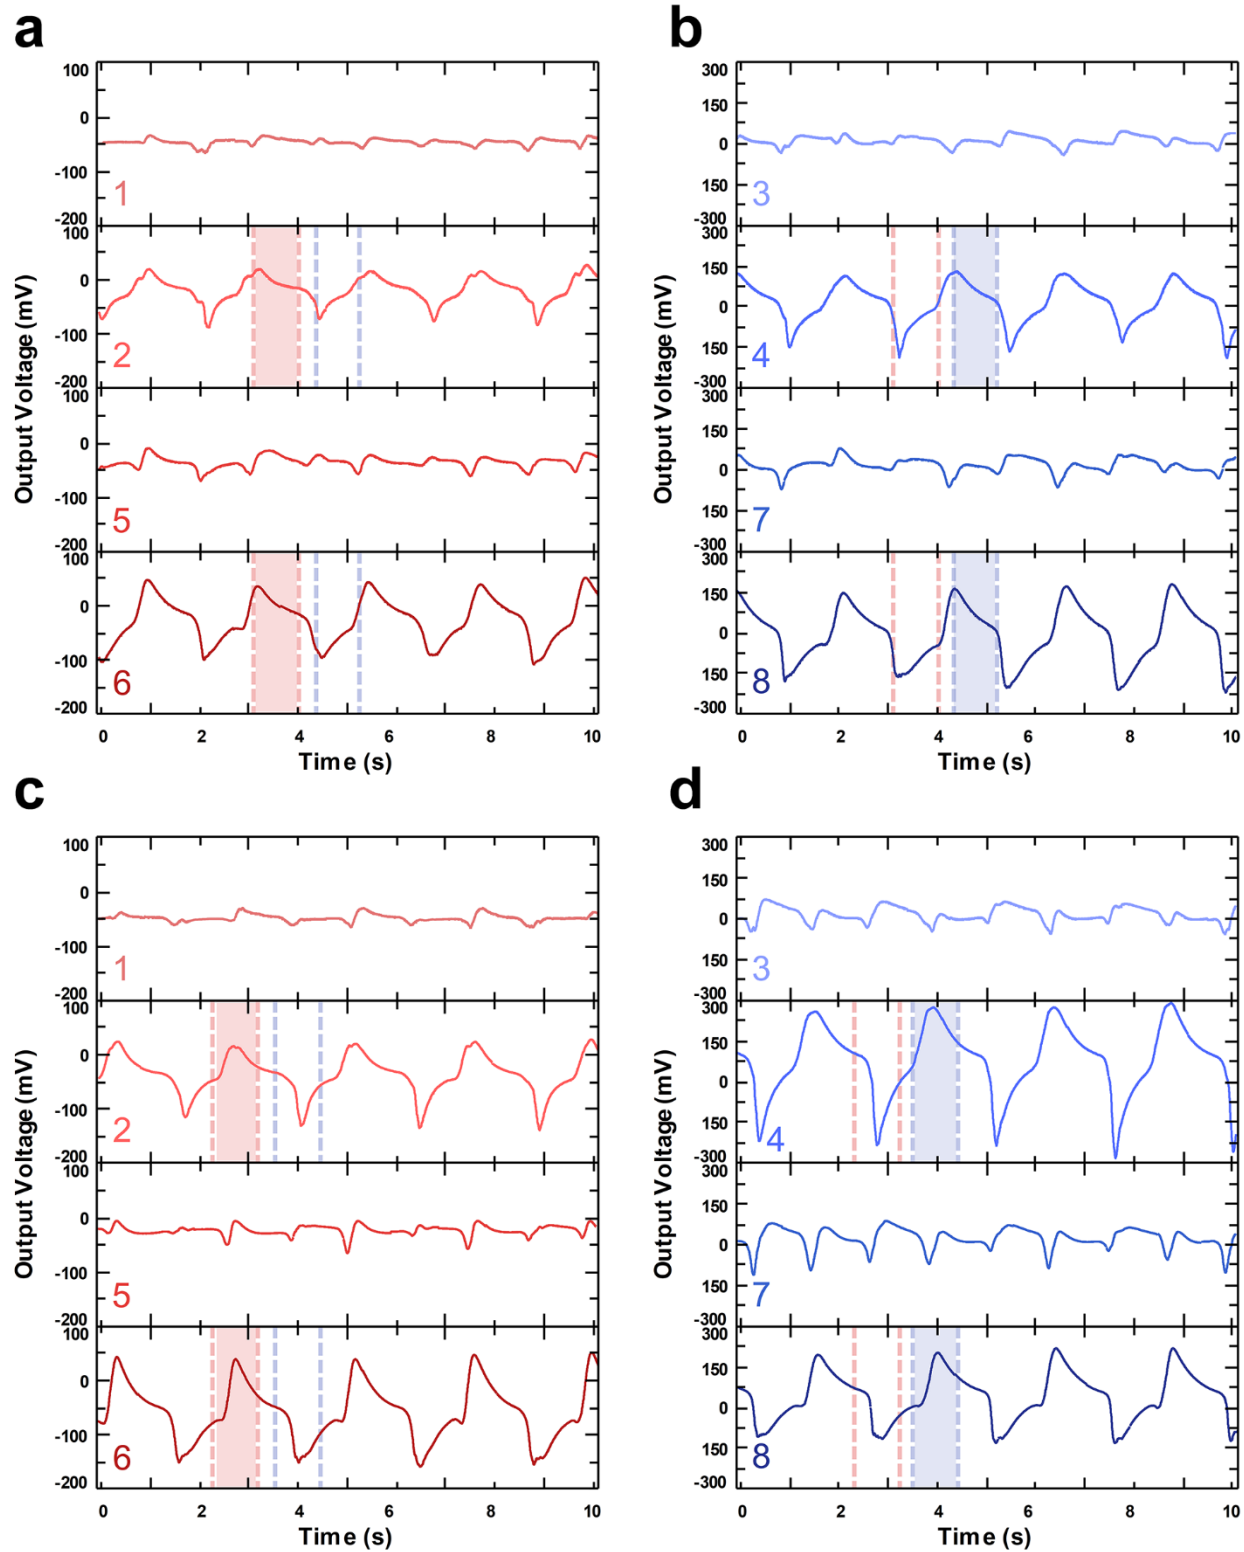

**Figure A4.** Voltage measurements of the OT-TES from eight different Al electrodes that have adjusted tilt angle in diagonal side. (a) The DAQ output voltage of the left side electrodes at  $10^\circ$  (b) The DAQ output voltage of the right side electrodes at  $10^\circ$  (c) The DAQ output voltage of the left side electrodes at  $20^\circ$  (d) The DAQ output voltage of the right side electrodes at  $20^\circ$ .
